# Supplementary material for: Smoking in Correctional Settings Worldwide: Prevalence, Bans, and Interventions
Source: PubMed Central journal article supplement — Epidemiol Rev. 2018 May 8;40(1):82–95. doi: 10.1093/epirev/mxy005 (PMC5982806; doi:10.1093/epirev/mxy005), 2018-05-08
Supplement: mxy005spauldingwebmaterialfinal.pdf [file mxy005spauldingwebmaterialfinal.pdf]

## Web Appendix 1

### Case study United States—State Prisons: Prevalence and Effect of Bans

Binswanger in 2014<sup>1</sup> published data collected by the US Bureau of Justice Statistics for its 2004 survey of sentenced persons in state correctional facilities. Web table 1 shows data from this national representative sample of 14,499 subjects in 287 facilities. Data from other studies in the same era overlapped this comprehensive survey and were excluded from this review. In 2004, 32 of the 50 state prison systems had at least a partial ban on smoking; 22 systems banned smoking outdoors. In 2011, 48 states banned smoking in at least some areas; 39 banned outdoor smoking. Mortality from tobacco-related causes was statistically lower in states with tobacco bans and lowest in those that banned both indoor and outdoor smoking (incidence rate ratio 0.85, 95% CI 0.82-0.87). Reductions in cardiovascular, pulmonary and cancer-related deaths were seen.

**Web table 1: Smoking status among US State Prisoners, 2004 (SOURCE: Binswanger 2014)**

|                                  | All % | Men % | Women % |
|----------------------------------|-------|-------|---------|
| Ever smoked                      | 75.8  | 75.6  | 78.8    |
| Current smokers                  | 38.9  | 38.3  | 46.7    |
| Former smoker                    | 37.0  | 37.0  | 32.1    |
| Smoked daily before arrest       | 56.3  | 55.8  | 64.0    |
| Smoked 'some days' before arrest | 7.6   | 7.7   | 7.7     |

### US—Federal Prisons and Jails: Bans

The Federal Bureau of Prisons imposed a smoking ban in 2004.<sup>2</sup> A systematic review of US jail and prison policies on smoking demonstrated that the trend towards smoke-free jails pre-dated that in prisons, and more than half of jails have complete bans on smoking.<sup>3</sup>

.....

## Web Appendix 2

### Case study Australian prisons: Prevalence, Disparities and Bans

#### Prevalence

Despite declining levels of tobacco smoking in Australia’s general population, where 60% of persons aged over 14 years have never smoked and only 13% currently smoke, the prevalence of current smoking among persons entering prison is 74% and only 13% had never smoked.<sup>4</sup> Most smoke daily; 50% would like to quit.<sup>5</sup>

**Web Table 2. Smoking status among Australian prison populations (Source: Australian Institute of Health and Welfare, Australia 2014, and website <http://www.aihw.gov.au/prisoner-health/smoking/>)**

|                            | All % | Men % | Women % |
|----------------------------|-------|-------|---------|
| Current smokers, at entry  | 74    | 74    | 69      |
| Smoked daily before arrest | 69    | 69    | 66      |

#### Disparities

In many countries, minority populations have higher rates of both smoking and incarceration than the majority; this pattern is striking in Australia. Indigenous Australians comprise 27% of prison population,<sup>5</sup> but only 2% of the Australian general population. Smoking among persons in prison who are indigenous is particularly high.

**Web Figure 1. Proportion of “Never Smokers”, general community and prison entrants, people aged 18-44, by Indigenous status, 2011-13 and 2015**

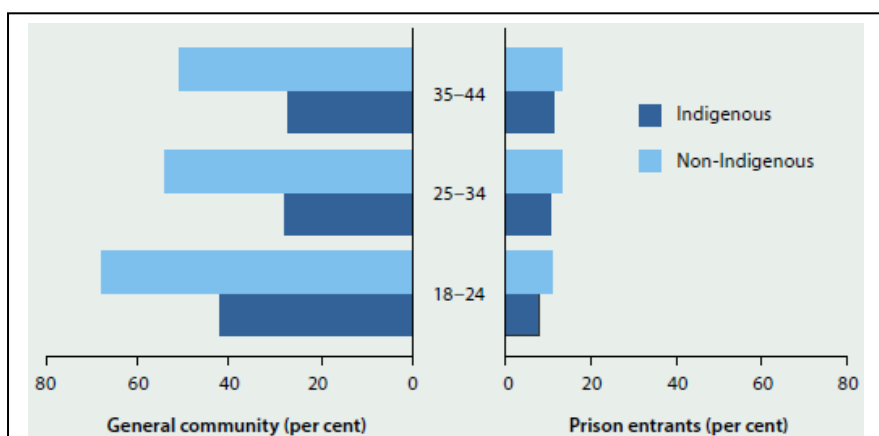

Source: Australian Institute of Health and Welfare

<http://www.aihw.gov.au/prisoner-health/smoking/>

#### Bans

The first smoking ban in prisons across Australia was in the Northern Territory from July 2013, Queensland from May 2014, Tasmania from February 2015, Victoria from July 2015, and New South Wales from August 2015. In other jurisdictions, i.e. Western Australia, South Australia and the Australian Capital Territory, restrictions on where people can smoke rather than bans on smoking are in place.<sup>6</sup> A slightly lower

prevalence of smoking has been recorded among prison entrants to prisons which ban smoking (66%) compared to those without smoking bans (78%).<sup>5</sup> More prisons without complete smoking bans offer assistance with smoking cessation (72%) than in those where no tobacco is permitted (62%); uptake in services is higher among those with complete bans.<sup>5</sup>

**Web Table 3. Bans in China**

| <b>Regional Jurisdiction System</b> | <b>Website</b>                                                    | <b>Smoking prevalence</b> | <b>Smoking ban</b>                  | <b>Cessation intervention</b> |
|-------------------------------------|-------------------------------------------------------------------|---------------------------|-------------------------------------|-------------------------------|
| Beijing                             | <a href="http://www.bjjgj.gov.cn">http://www.bjjgj.gov.cn</a>     | N/A                       | N/A                                 | No information                |
| Yunnan                              | <a href="http://www.ynjy.gov.cn">http://www.ynjy.gov.cn</a>       | N/A                       | N/A                                 | No information                |
| Zhejiang                            | <a href="http://www.zjsjy.gov.cn">http://www.zjsjy.gov.cn</a>     | N/A                       | N/A                                 | No information                |
| Guangxi                             | <a href="http://www.gxjy.gov.cn">http://www.gxjy.gov.cn</a>       | N/A                       | No ban.<br>Designated smoking area. | No information                |
| Sichuan                             | <a href="http://www.scjyglj.gov.cn">http://www.scjyglj.gov.cn</a> | N/A                       | No ban. No smoking in public area.  | No information                |
| Guizhou                             | <a href="http://www.gzjyj.gov.cn">http://www.gzjyj.gov.cn</a>     | N/A                       | N/A                                 | No information                |
| Shanghai                            | <a href="https://jyj.sh.gov.cn">https://jyj.sh.gov.cn</a>         | N/A                       | Smoking ban since 01/12/2009        | No information                |
| Henan                               | <a href="http://www.hnjyw.gov.cn">http://www.hnjyw.gov.cn</a>     | N/A                       | N/A                                 | No information                |

**Web Table 4. Other countries with Bans:**

Note—WHO as source refers to the following website:

<http://data.euro.who.int/tobacco/Sites/SearchByFCTCMeasureResponse.aspx>

MRC/CSO refers to a 2015 University of Glasgow (Scotland) review study for the Medical Research Council/Chief Scientist Office.<sup>7</sup>

| Country                             | Data Source (year of ban)            | Partial Ban               | Complete Ban               | No Ban | No Information |
|-------------------------------------|--------------------------------------|---------------------------|----------------------------|--------|----------------|
| Albania                             | WHO (2006)                           | X                         |                            |        |                |
| Australia                           | 2015 <sup>5</sup>                    | X (WA, SA, ACT)           | X (NT, NSW, VIC, QLD, TAS) |        |                |
| Cambodia, compulsory drug treatment | Unknown year <sup>8</sup>            |                           | X                          |        |                |
| Canada                              | MRC/CSO (2008) <sup>9</sup>          | X                         |                            |        |                |
| England                             | 2016 <sup>10</sup>                   | (Banned, then overturned) |                            |        |                |
| Hungary                             | WHO (2012)                           | X                         |                            |        |                |
| Ireland                             | WHO (2002)                           | X                         |                            |        |                |
| Latvia                              | WHO (2010)                           |                           | X                          |        |                |
| Montenegro                          | WHO (2011)                           | X                         |                            |        |                |
| New Zealand                         | 2011 <sup>11</sup><br>(also:MRC/CSO) |                           | X                          |        |                |
| Nigeria                             | 1955 <sup>12</sup>                   |                           | X                          |        |                |
| Northern Ireland                    | WHO (2006)                           | X                         |                            |        |                |
| Russian Federation                  | WHO (2013)                           |                           | X                          |        |                |
| Scotland                            | MRC/CSO (2006)                       | X                         |                            |        |                |
| Serbia                              | WHO (2010)                           | X                         |                            |        |                |
| Spain                               | WHO(2006)                            |                           |                            |        | X              |
| Sweden                              | Wikipedia                            |                           | X                          |        |                |
| Ukraine                             | WHO (2005)                           |                           |                            |        | X              |
| United States/Federal Prisons       | 2004 <sup>2</sup>                    |                           | X                          |        |                |
| Wales                               | MRC/CSO (2016)                       |                           | X                          |        |                |

REFERENCES

1. Binswanger IA, Carson EA, Krueger PM, Mueller SR, Steiner JF, Sabol WJ. Prison tobacco control policies and deaths from smoking in United States prisons: population based retrospective analysis. *BMJ*. 2014;349.
2. Martin SA, Celli BR, DiFranza JR, et al. Health effects of the Federal Bureau of Prisons tobacco ban. *BMC Pulm Med*. 2012;12:64.
3. Kennedy SM, Davis SP, Thorne SL. Smoke-free policies in U.S. Prisons and jails: A review of the literature. *Nicotine & tobacco research : official journal of the Society for Research on Nicotine and Tobacco*. 2015;17(6):629-635.
4. Australian Institute of Health and Welfare 2016. Australia's health 2016. Australia's health series no.15. Cat. no. AUS 199. Canberra: AIHW. Available: <http://www.aihw.gov.au/publication-detail/?id=6012955544>. Accessed 2017 July 15.
5. Australian Institute of Health and Welfare 2015. The health of Australia's prisoners 2015. Cat. no. PHE 207. Canberra: AIHW. Available: <https://www.aihw.gov.au/getmedia/9c42d6f3-2631-4452-b0df-9067fd71e33a/18878.pdf.aspx?inline=true>. Accessed 2017 July 15.
6. Hopkins R, Dolan KA. Trends in cancer incidence and survival for Indigenous and non-Indigenous people in the Northern Territory. *The Medical journal of Australia*. 2017;205(10):46.
7. Sweeting H, Hunt K. Evidence on Smoking and Smoking Restrictions in Prisons: A Scoping Review for the Scottish Prison Service's Tobacco Strategy Group. Available: <http://www.sphsu.mrc.ac.uk/op25-sps-literature-review-v2.pdf> Accessed 25 January 2018. 2015.
8. Amon J, Pearshouse R, Cohen J, Schleifer R. Compulsory drug detention centers in China, Cambodia, Vietnam, and Laos: health and human rights abuses. Available: <https://cdn2.sph.harvard.edu/wp-content/uploads/sites/13/2013/12/Compulsory-drug-detention-centers-in-china-cambodia-vietnam-and-laos-health-and-human-rights-abuses-.pdf> Accessed 2017 July 6. *Health Hum Rights*. 2013;15(2):124-137.
9. Collier R. Prison smoking bans: clearing the air. *CMAJ : Canadian Medical Association journal = journal de l'Association medicale canadienne*. 2013;185(10):E474.
10. Bowcott O, Travis A. Prison smoking ban overturned by court of appeal. March 8, 2016. Available: <https://www.theguardian.com/society/2016/mar/08/prison-smoking-ban-overturned-by-court-of-appeal>. Accessed 2017 July 14. *The Guardian*.
11. Thornley S, Dirks KN, Edwards R, Woodward A, Marshall R. Indoor air pollution levels were halved as a result of a national tobacco ban in a New Zealand prison. *Nicotine & tobacco research : official journal of the Society for Research on Nicotine and Tobacco*. 2013;15(2):343-347.
12. Araromi MA. Prisoners' rights under the Nigerian law: legal pathways to progressive realization and protection. *Journal of Sustainable Development Law and Policy (The)*. 2015;6(1):169-198.
